# Supplementary material for: Senescent cells perturb intestinal stem cell differentiation through Ptk7 induced noncanonical Wnt and YAP signaling
Source: PubMed Central journal article supplement (PMC9834240; doi:10.1038/s41467-022-35487-9), 2023-01-11
Supplement: 41467_2022_35487_MOESM8_ESM.pdf [file 41467_2022_35487_MOESM8_ESM.pdf]

## Reporting Summary

Nature Portfolio wishes to improve the reproducibility of the work that we publish. This form provides structure for consistency and transparency in reporting. For further information on Nature Portfolio policies, see our [Editorial Policies](#) and the [Editorial Policy Checklist](#).

### Statistics

For all statistical analyses, confirm that the following items are present in the figure legend, table legend, main text, or Methods section.

n/a Confirmed

- The exact sample size ( $n$ ) for each experimental group/condition, given as a discrete number and unit of measurement
- A statement on whether measurements were taken from distinct samples or whether the same sample was measured repeatedly
- The statistical test(s) used AND whether they are one- or two-sided  
*Only common tests should be described solely by name; describe more complex techniques in the Methods section.*
- A description of all covariates tested
- A description of any assumptions or corrections, such as tests of normality and adjustment for multiple comparisons
- A full description of the statistical parameters including central tendency (e.g. means) or other basic estimates (e.g. regression coefficient) AND variation (e.g. standard deviation) or associated estimates of uncertainty (e.g. confidence intervals)
- For null hypothesis testing, the test statistic (e.g.  $F$ ,  $t$ ,  $r$ ) with confidence intervals, effect sizes, degrees of freedom and  $P$  value noted  
*Give  $P$  values as exact values whenever suitable.*
- For Bayesian analysis, information on the choice of priors and Markov chain Monte Carlo settings
- For hierarchical and complex designs, identification of the appropriate level for tests and full reporting of outcomes
- Estimates of effect sizes (e.g. Cohen's  $d$ , Pearson's  $r$ ), indicating how they were calculated

*Our web collection on [statistics for biologists](#) contains articles on many of the points above.*

### Software and code

Policy information about [availability of computer code](#)

Data collection HTSeqGenie v4.2.2. GSNAP v2013-11-01; Paragon algorithm (4.5.0.0,1654);10x Cell Ranger

Data analysis GraphPad Prism v7.02; the voom and the Limma R packages; RcisTarget; scikit-image; MATLAB; Scanpy; Harmony Clusters; Seurat; Python matplotlib; scan, seaborn, SciPy and scikit-posthoc packages.

For manuscripts utilizing custom algorithms or software that are central to the research but not yet described in published literature, software must be made available to editors and reviewers. We strongly encourage code deposition in a community repository (e.g. GitHub). See the Nature Portfolio [guidelines for submitting code & software](#) for further information.

### Data

Policy information about [availability of data](#)

All manuscripts must include a [data availability statement](#). This statement should provide the following information, where applicable:

- Accession codes, unique identifiers, or web links for publicly available datasets
- A description of any restrictions on data availability
- For clinical datasets or third party data, please ensure that the statement adheres to our [policy](#)

The mass spectrometric raw data are deposited at <ftp://massive.ucsd.edu/MSV000088032/> with the MassIVE ID MSV000088032; it is also available at

## Field-specific reporting

Please select the one below that is the best fit for your research. If you are not sure, read the appropriate sections before making your selection.

- Life sciences       Behavioural & social sciences       Ecological, evolutionary & environmental sciences

For a reference copy of the document with all sections, see [nature.com/documents/nr-reporting-summary-flat.pdf](https://www.nature.com/documents/nr-reporting-summary-flat.pdf)

## Life sciences study design

All studies must disclose on these points even when the disclosure is negative.

|                 |                                                                                                                                                                                                                                                                                              |
|-----------------|----------------------------------------------------------------------------------------------------------------------------------------------------------------------------------------------------------------------------------------------------------------------------------------------|
| Sample size     | No statistical methods were used to calculate the sample size. Sample sizes (numbers of independently derived organoid cultures) were determined based on variation observed in pilot studies and exact numbers are described in Figure legends.                                             |
| Data exclusions | No data were excluded from analyses.                                                                                                                                                                                                                                                         |
| Replication     | The number of replications for each experiment is listed in figure legends and materials. All attempts for replication were successful. MS screen and RNAseq screens were performed once for data gathering / hypothesis generation, and the data generated were validated by other methods. |
| Randomization   | Animals for organoid generation were randomly selected. Organoids established from each individual mouse were used for both control and experimental groups and treated randomly.                                                                                                            |
| Blinding        | Image analysis, quantification, and data analysis were performed on samples that were blinded to the experimenter.                                                                                                                                                                           |

## Reporting for specific materials, systems and methods

We require information from authors about some types of materials, experimental systems and methods used in many studies. Here, indicate whether each material, system or method listed is relevant to your study. If you are not sure if a list item applies to your research, read the appropriate section before selecting a response.

### Materials & experimental systems

| n/a                                 | Involved in the study                                           |
|-------------------------------------|-----------------------------------------------------------------|
| <input type="checkbox"/>            | <input checked="" type="checkbox"/> Antibodies                  |
| <input type="checkbox"/>            | <input checked="" type="checkbox"/> Eukaryotic cell lines       |
| <input checked="" type="checkbox"/> | <input type="checkbox"/> Palaeontology and archaeology          |
| <input type="checkbox"/>            | <input checked="" type="checkbox"/> Animals and other organisms |
| <input checked="" type="checkbox"/> | <input type="checkbox"/> Human research participants            |
| <input checked="" type="checkbox"/> | <input type="checkbox"/> Clinical data                          |
| <input checked="" type="checkbox"/> | <input type="checkbox"/> Dual use research of concern           |

### Methods

| n/a                                 | Involved in the study                           |
|-------------------------------------|-------------------------------------------------|
| <input checked="" type="checkbox"/> | <input type="checkbox"/> ChIP-seq               |
| <input checked="" type="checkbox"/> | <input type="checkbox"/> Flow cytometry         |
| <input checked="" type="checkbox"/> | <input type="checkbox"/> MRI-based neuroimaging |

## Antibodies

### Antibodies used

anti-Ki67 BD Biosciences 550609  
 anti-phospho-Histone H3 EMD Millipore 06-570  
 anti-GFP Abcam ab13970  
 anti-Olfm4 Cell Signaling Technology 39141S  
 anti-Lyz Dako EC 3.2.1.17  
 anti-ChgA Novus Biologicals Biologicals NB120-15160  
 anti-Dclk Abcam ab31704  
 anti-Muc2 Abcam ab134119  
 anti-Aldolase B Abcam ab75751  
 Rabbit IgG Thermo Fisher Scientific 02-6102  
 anti-Ptk7 Sigma-Aldrich HPA003222  
 anti-YAP Cell Signaling Technology 14074S  
 anti-hlgG1-Fc-HRP Thermo Fisher Scientific A-10648  
 anti-His-tag-HRP Abcam ab1187  
 anti-rabbit IgG-HRP GE Healthcare NA934  
 anti-chicken IgY Alexa Fluor 488 Jackson ImmunoResearch Laboratories 703-545-155  
 Anti-rabbit IgG Alexa Fluor Plus 555 Thermo Fisher Scientific A32794  
 anti-MMP14 Abcam ab51074  
 anti-alpha-Tubulin Cell Signaling Technology 3873S

anti-beta-Actin Cell Signaling Technology 8457S  
anti-Vimentin Sigma-Aldrich AB5733

## Validation

Validation of all commercial antibodies are available at the manufacturer's websites. The validation reference for each antibody is listed below:

1. anti-Ki67 BD Biosciences 550609. <https://www.bdbiosciences.com/en-us/products/reagents/flow-cytometry-reagents/research-reagents/single-color-antibodies-ruo/purified-mouse-anti-ki-67.550609>
2. anti-phospho-Histone H3 EMD Millipore 06-570. [https://www.emdmillipore.com/US/en/product/Anti-phospho-Histone-H3-Ser10-Antibody-Mitosis-Marker,MM\\_NF-06-570](https://www.emdmillipore.com/US/en/product/Anti-phospho-Histone-H3-Ser10-Antibody-Mitosis-Marker,MM_NF-06-570)
3. anti-GFP Abcam ab13970. <https://www.abcam.com/gfp-antibody-ab13970.html>
4. anti-Olfm4 Cell Signaling Technology 39141S. <https://www.cellsignal.com/products/primary-antibodies/olfm4-d6y5a-xp-rabbit-mab-mouse-specific/39141>
5. anti-Lyz Dako EC 3.2.1.17. [https://www.agilent.com/en/product/immunohistochemistry/antibodies-controls/primary-antibodies/lysozyme-ec-3-2-1-17-\(concentrate\)-76124](https://www.agilent.com/en/product/immunohistochemistry/antibodies-controls/primary-antibodies/lysozyme-ec-3-2-1-17-(concentrate)-76124)
6. anti-ChgA Novus Biologicals Biologicals NB120-15160. [https://www.novusbio.com/products/chromogranin-a-antibody\\_nb120-15160](https://www.novusbio.com/products/chromogranin-a-antibody_nb120-15160)
7. anti-DclK Abcam ab31704. <https://www.abcam.com/dcamk1-antibody-ab31704.html>
8. anti-Muc2 Abcam ab134119. <https://www.abcam.com/muc2-antibody-epr6145-ab134119.html>
9. anti-Aldolase B Abcam ab75751. <https://www.abcam.com/aldolase-b-aldolase-c-antibody-epr3138y-ab75751.html>
10. Rabbit IgG Thermo Fisher Scientific 02-6102. <https://www.thermofisher.com/antibody/product/Rabbit-IgG-Isotype-Control/02-6102>
11. anti-Ptk7 Sigma-Aldrich HPA003222. <https://www.sigmaaldrich.com/US/en/product/sigma/hpa003222>
12. anti-YAP Cell Signaling Technology 14074S. <https://www.cellsignal.com/products/primary-antibodies/yap-d8h1x-xp-rabbit-mab/14074>
13. anti-hlgG1-Fc-HRP Thermo Fisher Scientific A-10648. <https://www.thermofisher.com/antibody/product/Mouse-anti-Human-IgG1-Fc-Secondary-Antibody-clone-HP6069-Monoclonal/A-10648>
14. anti-His-tag-HRP Abcam ab1187. <https://www.abcam.com/hrp-6x-his-tag-antibody-ab1187.html>
15. anti-rabbit IgG-HRP GE Healthcare NA934. <https://www.sigmaaldrich.com/US/en/product/sigma/gena9341ml>
16. anti-chicken IgY Alexa Fluor 488 Jackson ImmunoResearch Laboratories 703-545-155. <https://www.jacksonimmuno.com/catalog/products/703-545-155>
17. Anti-rabbit IgG Alexa Fluor Plus 555 Thermo Fisher Scientific A32794. <https://www.thermofisher.com/antibody/product/Donkey-anti-Rabbit-IgG-H-L-Highly-Cross-Adsorbed-Secondary-Antibody-Polyclonal/A32794>
18. anti-MMP14 Abcam ab51074. <https://www.abcam.com/mmp14-antibody-ep1264y-ab51074.html>
19. anti-alpha-Tubulin Cell Signaling Technology 3873S. <https://www.cellsignal.com/products/primary-antibodies/a-tubulin-dm1a-mouse-mab/3873>
20. anti-beta-Actin Cell Signaling Technology 8457S. [https://www.cellsignal.com/products/primary-antibodies/b-actin-d6a8-rabbit-mab/8457?site-search-type=Products&N=4294956287&Ntt=8457s&fromPage=plp&\\_requestid=2829368](https://www.cellsignal.com/products/primary-antibodies/b-actin-d6a8-rabbit-mab/8457?site-search-type=Products&N=4294956287&Ntt=8457s&fromPage=plp&_requestid=2829368)
21. anti-Vimentin Sigma-Aldrich AB5733. [https://www.emdmillipore.com/US/en/product/Anti-Vimentin-Antibody,MM\\_NF-AB5733?ReferrerURL=https%3A%2F%2Fwww.google.com%2F](https://www.emdmillipore.com/US/en/product/Anti-Vimentin-Antibody,MM_NF-AB5733?ReferrerURL=https%3A%2F%2Fwww.google.com%2F)

## Eukaryotic cell lines

Policy information about [cell lines](#)

|                                                                      |                                                                                                                                                                                                                                                                                                            |
|----------------------------------------------------------------------|------------------------------------------------------------------------------------------------------------------------------------------------------------------------------------------------------------------------------------------------------------------------------------------------------------|
| Cell line source(s)                                                  | HEK293-TB, sourced at Genentech was used for reporter assays                                                                                                                                                                                                                                               |
| Authentication                                                       | HEK293-TB was generated, tested, and published previously (please see below), and authenticated here based on the responsiveness of the luciferase reporters.<br>Zhang et al., Nature Chemical Biology volume 5, pages217–219 (2009)<br>Nile et al, Nature Chemical Biology volume 14, pages582–590 (2018) |
| Mycoplasma contamination                                             | The cell line was not tested for Mycoplasma contamination.                                                                                                                                                                                                                                                 |
| Commonly misidentified lines<br>(See <a href="#">ICLAC</a> register) | NA                                                                                                                                                                                                                                                                                                         |

## Animals and other organisms

Policy information about [studies involving animals](#); [ARRIVE guidelines](#) recommended for reporting animal research

|                         |                                                                                                                                                                                                                                                                    |
|-------------------------|--------------------------------------------------------------------------------------------------------------------------------------------------------------------------------------------------------------------------------------------------------------------|
| Laboratory animals      | All mice were housed in a Specific Pathogen Free (SPF) facility, a HEPA filtered room and using a Tecniplast individually ventilated caging system / room. The room has controlled temperature (20–22°C), humidity (30%–70%) and light (12 hour light-dark cycle). |
| Wild animals            | No wild animals were used in the study.                                                                                                                                                                                                                            |
| Field-collected samples | No field collected samples were used in the study.                                                                                                                                                                                                                 |
| Ethics oversight        | All mice were used in accordance with protocols approved by Genentech's Institutional Animal Care and Use Committee and adhere to the NRC Guidelines for the Care and Use of Laboratory Animals.                                                                   |

Note that full information on the approval of the study protocol must also be provided in the manuscript.
